# Supplementary material for: The met and unmet health needs for HIV, hypertension, and diabetes in rural KwaZulu-Natal, South Africa: analysis of a cross-sectional multimorbidity survey
Source: PubMed Central journal article supplement (PMC10447220; doi:10.1016/s2214-109x(23)00239-5), 2023-08-15
Supplement: mmc2.pdf [file mmc2.pdf]

# THE LANCET

## Global Health

### Supplementary appendix 2

This appendix formed part of the original submission and has been peer reviewed. We post it as supplied by the authors.

Supplement to: Singh U, Olivier S, Cuadros D, et al. The met and unmet health needs for HIV, hypertension, and diabetes in rural KwaZulu-Natal, South Africa: analysis of a cross-sectional multimorbidity survey. *Lancet Glob Health* 2023; **11**: e1372–82.

# Appendix

## Contents

|                                                                                 |    |
|---------------------------------------------------------------------------------|----|
| Strobe checklist.....                                                           | 2  |
| Vukuzazi study team .....                                                       | 5  |
| Supplemental methods.....                                                       | 8  |
| Figure S1. Cohort design, data collection and mobile health camp structure..... | 10 |
| Figure S2. Overview of recruitment of participants in the Vukuzazi study.....   | 12 |
| Table S1. Differences between enrolled and unenrolled participants .....        | 13 |
| Supplemental figures and tables.....                                            | 14 |
| Table S2. Confidence interval data for figure 2 .....                           | 14 |
| Table S3. Needs scores broken down by disease combinations. ....                | 16 |
| Vukuzazi questionnaires.....                                                    | 17 |
| References.....                                                                 | 29 |

# Strobe checklist

STROBE Statement—Checklist of items that should be included in reports of *cross-sectional studies*

|                           | Item No | Recommendation                                                                                                                                                                       |   |
|---------------------------|---------|--------------------------------------------------------------------------------------------------------------------------------------------------------------------------------------|---|
| <b>Title and abstract</b> | 1       | (a) Indicate the study's design with a commonly used term in the title or the abstract                                                                                               | ✓ |
|                           |         | (b) Provide in the abstract an informative and balanced summary of what was done and what was found                                                                                  | ✓ |
| <b>Introduction</b>       |         |                                                                                                                                                                                      |   |
| Background/rationale      | 2       | Explain the scientific background and rationale for the investigation being reported                                                                                                 | ✓ |
| Objectives                | 3       | State specific objectives, including any prespecified hypotheses                                                                                                                     | ✓ |
| <b>Methods</b>            |         |                                                                                                                                                                                      |   |
| Study design              | 4       | Present key elements of study design early in the paper                                                                                                                              | ✓ |
| Setting                   | 5       | Describe the setting, locations, and relevant dates, including periods of recruitment, exposure, follow-up, and data collection                                                      | ✓ |
| Participants              | 6       | (a) Give the eligibility criteria, and the sources and methods of selection of participants                                                                                          | ✓ |
| Variables                 | 7       | Clearly define all outcomes, exposures, predictors, potential confounders, and effect modifiers. Give diagnostic criteria, if applicable                                             | ✓ |
| Data sources/measurement  | 8*      | For each variable of interest, give sources of data and details of methods of assessment (measurement). Describe comparability of assessment methods if there is more than one group | ✓ |
| Bias                      | 9       | Describe any efforts to address potential sources of bias                                                                                                                            | ✓ |
| Study size                | 10      | Explain how the study size was arrived at                                                                                                                                            | ✓ |
| Quantitative variables    | 11      | Explain how quantitative variables were handled in the analyses. If applicable, describe which groupings were chosen and why                                                         | ✓ |
| Statistical methods       | 12      | (a) Describe all statistical methods, including those used to control for confounding                                                                                                | ✓ |
|                           |         | (b) Describe any methods used to examine subgroups and interactions                                                                                                                  | ✓ |
|                           |         | (c) Explain how missing data were addressed                                                                                                                                          | ✓ |
|                           |         | (d) If applicable, describe analytical methods taking account of sampling strategy                                                                                                   | ✓ |
|                           |         | (e) Describe any sensitivity analyses                                                                                                                                                | ✓ |

| <b>Results</b>           |     |                                                                                                                                                                                                              |   |
|--------------------------|-----|--------------------------------------------------------------------------------------------------------------------------------------------------------------------------------------------------------------|---|
| Participants             | 13* | (a) Report numbers of individuals at each stage of study—eg numbers potentially eligible, examined for eligibility, confirmed eligible, included in the study, completing follow-up, and analysed            | ✓ |
|                          |     | (b) Give reasons for non-participation at each stage                                                                                                                                                         | ✓ |
|                          |     | (c) Consider use of a flow diagram                                                                                                                                                                           | ✓ |
| Descriptive data         | 14* | (a) Give characteristics of study participants (eg demographic, clinical, social) and information on exposures and potential confounders                                                                     | ✓ |
|                          |     | (b) Indicate number of participants with missing data for each variable of interest                                                                                                                          | ✓ |
| Outcome data             | 15* | Report numbers of outcome events or summary measures                                                                                                                                                         | ✓ |
| Main results             | 16  | (a) Give unadjusted estimates and, if applicable, confounder-adjusted estimates and their precision (eg, 95% confidence interval). Make clear which confounders were adjusted for and why they were included | ✓ |
|                          |     | (b) Report category boundaries when continuous variables were categorized                                                                                                                                    |   |
|                          |     | (c) If relevant, consider translating estimates of relative risk into absolute risk for a meaningful time period                                                                                             | ✓ |
| Other analyses           | 17  | Report other analyses done—eg analyses of subgroups and interactions, and sensitivity analyses                                                                                                               | ✓ |
| <b>Discussion</b>        |     |                                                                                                                                                                                                              |   |
| Key results              | 18  | Summarise key results with reference to study objectives                                                                                                                                                     | ✓ |
| Limitations              | 19  | Discuss limitations of the study, taking into account sources of potential bias or imprecision. Discuss both direction and magnitude of any potential bias                                                   | ✓ |
| Interpretation           | 20  | Give a cautious overall interpretation of results considering objectives, limitations, multiplicity of analyses, results from similar studies, and other relevant evidence                                   | ✓ |
| Generalisability         | 21  | Discuss the generalisability (external validity) of the study results                                                                                                                                        | ✓ |
| <b>Other information</b> |     |                                                                                                                                                                                                              |   |
| Funding                  | 22  | Give the source of funding and the role of the funders for the present study and, if applicable, for the original study on which the present article is based                                                | ✓ |

\*Give information separately for exposed and unexposed groups.

**Note:** An Explanation and Elaboration article discusses each checklist item and gives methodological background and published examples of transparent reporting. The STROBE checklist is best used in conjunction with this article (freely available on the Web sites of PLoS Medicine at <http://www.plosmedicine.org/>, Annals of Internal Medicine at <http://www.annals.org/>, and Epidemiology at <http://www.epidem.com/>). Information on the STROBE Initiative is available at [www.strobe-statement.org](http://www.strobe-statement.org).

## Vukuzazi study team

**Vukuzazi Team: Staff who significantly contributed to the implementation and conduct of Vukuzazi.**

\* Denotes team members who were closely involved with the design, implementation and oversight of Vukuzazi.

| Name                      | Role                                  |
|---------------------------|---------------------------------------|
| *Deenan Pillay            | Principal Investigator (2017-2019)    |
| *Willem Hanekom           | Principal Investigator (2019-present) |
| *Emily Wong               | Co-Principal Investigator             |
| *Mark Siedner             | Co-Principal Investigator             |
| *Olivier Koole            | Co-Principal Investigator (2017-2019) |
| *Thumbi Ndung'u           | Co-investigator                       |
| *Thandeka Khoza           | Co-investigator (2019-present)        |
| *Kobus Herbst             | Co-investigator                       |
| *Kathy Baisley            | Co-investigator                       |
| *Janet Seeley             | Co-investigator                       |
| *Alison Grant             | Co-investigator                       |
| *Resign Gunda             | Programme Manager                     |
| *Ashmika Surujdeen        | Study Coordinator                     |
| *Theresa Smit             | Head: Diagnostic Research             |
| *Dickman Gareta           | Head: Research Data Management        |
| *Day Munatsi              | Head: Research Data Systems           |
| *Ngcebo Mhlongo           | Study Physician                       |
| *Sanah Bucibo             | Lead Nurse                            |
| *Tshwaraganang Modise     | Research Data Manager                 |
| *Stephen Olivier          | Statistician                          |
| *Gregory Ording-Jespersen | Laboratory Data Supervisor            |
| *Innocentia Mpošana       | Diagnostic Laboratory Manager         |
| *Jaco Dreyer              | Senior Research Data Manager          |
| *Siyabonga Nxumalo        | Research Data Manager                 |
| *Khadija Khan             | Biorepository Manager                 |
| *Zizile Sikhosana         | Somkhele Laboratory Supervisor        |
| *Sashen Moodley           | Microbiology Laboratory Supervisor    |
| *Hollis Shen              | Head: Exploratory Research Division   |
| Kennedy Nyamande          | Pulmonology Consultant                |
| Mosa Suleman              | Pulmonology Consultant                |
| Jaikrishna Kalideen       | Radiologist                           |
| Ramesh Jackpersad         | Radiologist                           |
| Kgaugelo Moropane         | Radiographer                          |
| Boitsholo Mfolo           | Radiographer                          |
| Khabonina Malomane        | Radiographer                          |
| Hlolisile Khumalo         | Nursing Manager                       |
| Nompilo Buthelezi         | Training Coordinator                  |
| Nozipho Mbonambi          | Professional Nurse                    |
| Hloniphile Ngubane        | Professional Nurse                    |
| Thokozani Simelane        | Professional Nurse                    |
| Khanyisani Buthelezi      | Professional Nurse                    |
| Sphiwe Ntuli              | Professional Nurse                    |
| Nombuyiselo Zondi         | Professional Nurse                    |

|                             |                                        |
|-----------------------------|----------------------------------------|
| Siboniso Nene               | Professional Nurse                     |
| Bongumenzi Ndlovu           | Enrolled Nurse                         |
| Talente Ntimbane            | Enrolled Nurse                         |
| Mbali Mbuyisa               | Enrolled Nurse                         |
| Xolani Mkhize               | Enrolled Nurse                         |
| Melusi Sibiya               | Enrolled Nurse                         |
| Ntombiyenkosi Ntombela      | Enrolled Nurse                         |
| Mandisi Dlamini             | Enrolled Nurse                         |
| Hlobisile Chonco            | Enrolled Nurse                         |
| Hlengiwe Dlamini            | Enrolled Nurse                         |
| Doctar Mlambo               | Enrolled Nurse                         |
| Nonhlanhla Mzimela          | Enrolled Nurse                         |
| Zinhle Buthelezi            | Enrolled Nurse                         |
| Zinhle Mthembu              | Enrolled Nurse                         |
| Thokozani Bhengu            | Enrolled Nurse                         |
| Sandile Mthembu             | Enrolled Nurse                         |
| Phumelele Mthethwa          | Enrolled Nurse                         |
| Zamashandu Mbatha           | Enrolled Nurse                         |
| Welcome Petros Mthembu      | Enrolled Nurse                         |
| Anele Mkhwanazi             | Clinical Research Assistant Supervisor |
| Mandlakayise Zikhali        | Clinical Research Assistant Supervisor |
| Phakamani Mkhwanazi         | Clinical Research Assistant            |
| Ntombiyenhlahlala Mkhwanazi | Clinical Research Assistant            |
| Rose Myeni                  | Clinical Research Assistant            |
| Fezeka Mfeka                | Clinical Research Assistant            |
| Hlobisile Gumede            | Clinical Research Assistant            |
| Nonceba Mfeka               | Clinical Research Assistant            |
| Ayanda Zungu                | Clinical Research Assistant            |
| Hlobisile Gumede            | Clinical Research Assistant            |
| Nonhlanhla Mfekayi          | Clinical Research Assistant            |
| Smangaliso Zulu             | Clinical Research Assistant            |
| Mzamo Buthelezi             | Clinical Research Assistant            |
| Senzeni Mkhwanazi           | Clinical Research Assistant            |
| Mlungisi Dube               | Clinical Research Assistant            |
| Philippa Mathews            | Clinical Governance                    |
| Siphephelo Dlamini          | AHRI Nursing Manager                   |
| Hosea Kambonde              | IT Systems Developer                   |
| Lindani Mthembu             | Information Technology Assistant       |
| Seneme Mchunu               | Information Technology Assistant       |
| Sibahle Gumbi               | Research Admin Assistant               |
| Tumi Madolo                 | Research Data Manager                  |
| Thengokwakhe Nkosi          | Driver                                 |
| Sibusiso Mkhwanazi          | Driver                                 |
| Sibusiso Nsibande           | Driver                                 |
| Mpumelelo Steto             | Driver                                 |
| Sibusiso Mhlongo            | Driver                                 |
| Velile Vellem               | Driver                                 |
| Pfarelo Tshivase            | Driver                                 |
| Jabu Kwinda                 | Driver                                 |
| Bongani Magwaza             | General Worker                         |

|                        |                                               |
|------------------------|-----------------------------------------------|
| Siyabonga Nsibande     | General Worker                                |
| Skhumbuzo Mthombeni    | General Worker                                |
| Sphiwe Clement Mthembu | General Worker                                |
| Antony Rapulana        | Laboratory Technologist                       |
| Jade Cousins           | Laboratory Technologist                       |
| Thabile Zondi          | Laboratory Technologist                       |
| Nagavelli Padayachi    | Laboratory Technologist                       |
| Freddy Mabetlela       | Laboratory Technologist                       |
| Simphiwe Ntshangase    | Laboratory Technician/LIMS Administrator      |
| Nomfundo Luthuli       | Laboratory Technician                         |
| Sithembile Ngcobo      | Laboratory Technologist                       |
| Kayleen Brien          | Laboratory Technologist                       |
| Sizwe Ndlela           | Laboratory Technician                         |
| Nomfundo Ngema         | Laboratory Technician                         |
| Nokukhanya Ntshakala   | Laboratory Technician                         |
| Anupa Singh            | Laboratory Technician                         |
| Rochelle Singh         | Laboratory Technician                         |
| Logan Pillay           | Laboratory Technician                         |
| Kandaseelan Chetty     | Laboratory Technician                         |
| Ashantha Govender      | Laboratory Technician                         |
| Pamela Ramkalawon      | Laboratory Research Technician                |
| Nondumiso Mabaso       | Laboratory Intern                             |
| Kimeshree Perumal      | Laboratory Intern                             |
| Senamile Makhari       | Biorepository Laboratory Technician           |
| Nondumiso Khuluse      | Biorepository Laboratory Technician           |
| Nondumiso Zitha        | Biorepository Research Assistant              |
| Hlengiwe Khathi        | Biorepository Research Assistant              |
| Mbuti Mofokeng         | Clinical Specimen Driver/Laboratory Assistant |
| Nomathamsanqa Majazi   | Public Engagement                             |
| Nceba Gqaleni          | Public Engagement                             |
| Hannah Keal            | Communications                                |
| Phumla Ngcobo          | Communications                                |
| Costa Criticos         | Operational Oversight                         |
| Raynold Zondo          | Operational Oversight                         |
| Dilip Kalyan           | Operational Oversight                         |
| Clive Mavimbela        | Operational Oversight                         |
| Anand Ramnanan         | Procurement                                   |
| Sashin Harilall        | Grants Office                                 |



# Supplemental methods

## *Additional methodological details*

### Study area

The current manuscript reports the results of an analysis of data from the Vukuzazi study, which was a cross-sectional multimorbidity survey, the methodology of which has been published in detail in Gunda et al (1) and is explained in further detail below. The Vukuzazi study was conducted in the uMkhanyakude district in rural KwaZulu-Natal between May 2018 and March 2020. The study area was based in the southern portion of the Africa health research institute demographic surveillance area and covered a 482km<sup>2</sup> radius. The majority of residents in the area represented rural dwellers.

### Participant eligibility and recruitment:

Eligible participants were defined as all individuals ≥15 years of age residing in the southern portion of the Africa Health Research Institute demographic surveillance area. To be considered a resident, individuals needed to have slept at their residence for most nights during the preceding four months of the study. Demographic surveillance data was used to establish a list of eligible participants. Fieldworkers then visited households of eligible participants and provided written and verbal explanations on the Vukuzazi study and mobile health camps. Eligible participants were given a registered invitation to mobile health camps, either personally or via a proxy if they were not present at the time of the visit. Individuals with registered invitations could access mobile health camps on presentation of the invitation (Figure S1a).

### Mobile health camps

Mobile health camps were established within a 2km radius of homesteads. A total of 78 mobile health camps were held. On arrival at health camps, eligible participants first provided informed consent. enrolment in the study required that individuals were firstly eligible and secondly they provided written informed consent at the mobile health camps.

Once enrolled, participants completed a detailed health questionnaire and progressed to provide anthropometric and health measurements. This was followed by collection of blood samples, rectal swabs and sputum specimens. Lastly participants completed chest X-rays and then exited the mobile health camp (Figure S1b). Participants with normal test results were contacted and informed via sms or telephonically. Participants with abnormal results were invited for re-evaluation and were given their result at additional mobile clinics. Participants with persistently abnormal results following re-evaluation were linked to care (Figure S1a and Figure S1B).

### Informed consent:

On arrival at mobile health camps, potential participants were provided with further explanations on the study and requirements from participants. Assessment of individuals capacity to provide consent was also conducted. All participants provided written informed consent for disease testing, collection, storage and future use of specimens collected and stored in the Africa health research institute biorepository. Participants also provided

permission to be contacted for follow-up studies and with results of tests. Participants <18 years of age required assent from a parent or guardian prior to enrolment in the study.

Health questionnaire:

Detailed health questionnaires were administered by staff nurses at the mobile health camps. Questionnaires explored personal history of HIV, tuberculosis, diabetes mellitus and hypertension (detailed questionnaire is included at the end of this document).

Figure S1. Cohort design, data collection and mobile health camp structure

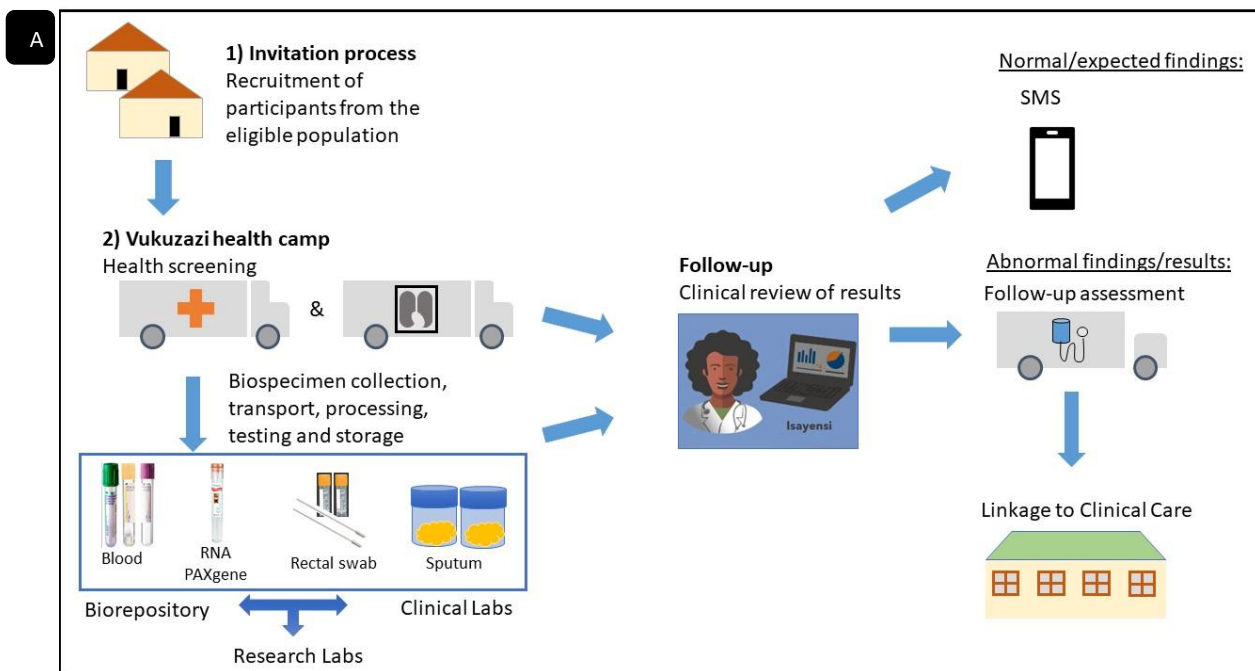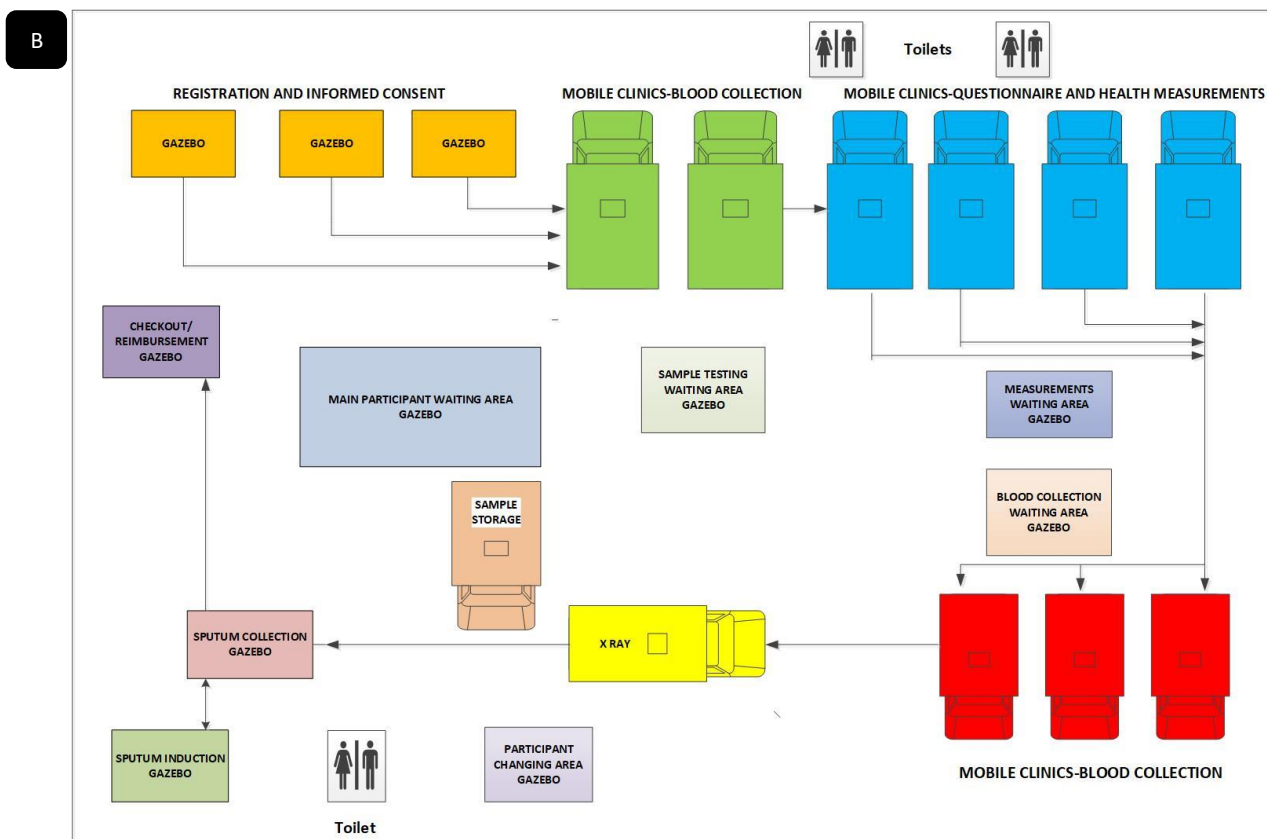

**Figure S1.** Overview of components of the Vukuzazi program (a) and the design/layout of mobile health camps (b), taken from Gunda et al., 2022 (figure 2 and 3 respectively) (1). (a) Eligible participants (i.e., all community members  $\geq 15$  years of age living within the 482km<sup>2</sup> demographic surveillance area in the uMkhanyakude district) were invited to attend mobile health camps. Invitations were delivered to households. Participants then visited mobile health camps, which were located within a

2km radius of homesteads. A total of 78 mobile health camps were held. At mobile health camps participants provided informed consent, completed health related questionnaires, anthropometric measurements and provided samples (blood, rectal swabs and sputum) which were sent to clinical laboratories and/or stored in a biorepository for further assessment. Participants with normal or expected results received phone calls to communicate results. Whilst, participants with abnormal results were given follow-up assessments. If results were persistently abnormal after a second visit participants were linked to clinical care at their nearest health facility. (b) as part of mobile health camps, participants first provided informed consent at a gazebo, thereafter they progressed to the mobile clinics for blood collection followed by health questionnaires and anthropometric measurements. Following this, all eligible participants received chest x-rays and had their sputum collected prior to exiting the camp. These images are re-published from Gunda et al., 2022 (1), which was published by Oxford University Press on behalf of the International Epidemiological Association as an Open Access article distributed under the terms of the Creative Commons Attribution License (<https://creativecommons.org/licenses/by/4.0/>), which permits unrestricted reuse, distribution, and reproduction in any medium, provided the original work is properly cited.

Figure S2. Overview of recruitment of participants in the Vukuzazi study

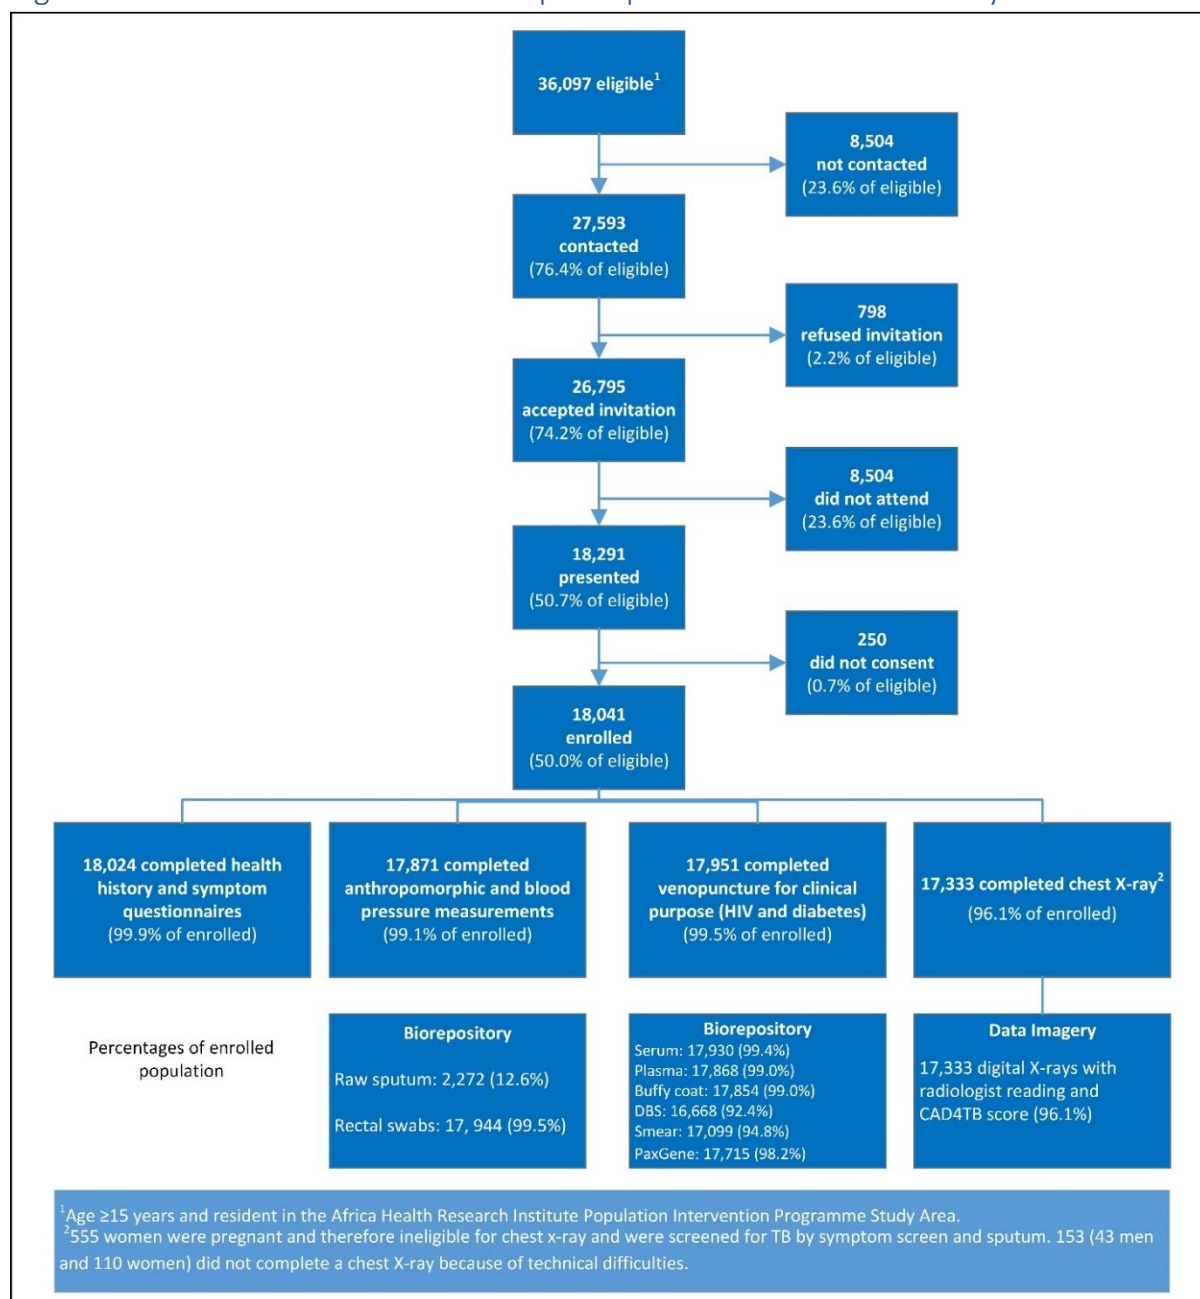

**Figure S2** Participant overview in the Vukuzazi study taken from Gunda et al., 2022 (1). Of the 36097 eligible participants at the time of the study, a total of 18041 were successfully enrolled in the study. The majority of participants completed all bio-sample, chest Xray and anthropometric assessments. Missing data did exist amongst participants. This image is re-published from Gunda et al., 2022 (1), which was published by Oxford University Press on behalf of the International Epidemiological Association as an Open Access article distributed under the terms of the Creative Commons Attribution License (<https://creativecommons.org/licenses/by/4.0/>), which permits unrestricted reuse, distribution, and reproduction in any medium, provided the original work is properly cited.

Table S1. Differences between enrolled and unenrolled participants

| Characteristic             | Vukuzazi participants<br>N = 18,041 <sup>1</sup> | Eligible population<br>N = 36,097 <sup>1</sup> | p-value <sup>2</sup> |
|----------------------------|--------------------------------------------------|------------------------------------------------|----------------------|
| <b>Age group</b>           |                                                  |                                                | <0.001               |
| 15-24                      | 4,977 (28%)                                      | 11,049 (31%)                                   |                      |
| 25-34                      | 3,371 (19%)                                      | 7,854 (22%)                                    |                      |
| 35-44                      | 2,634 (15%)                                      | 5,753 (16%)                                    |                      |
| 45-54                      | 2,240 (12%)                                      | 4,192 (12%)                                    |                      |
| 55-64                      | 2,353 (13%)                                      | 3,673 (10%)                                    |                      |
| 65+                        | 2,466 (14%)                                      | 3,576 (10%)                                    |                      |
| <b>Sex</b>                 |                                                  |                                                | <0.001               |
| Male                       | 5,811 (32%)                                      | 14,965 (41%)                                   |                      |
| Female                     | 12,230 (68%)                                     | 21,132 (59%)                                   |                      |
| <b>Education</b>           |                                                  |                                                | <0.001               |
| None                       | 4,532 (25%)                                      | 8,387 (24%)                                    |                      |
| Less than secondary        | 6,737 (38%)                                      | 11,910 (33%)                                   |                      |
| Secondary and above        | 6,666 (37%)                                      | 15,385 (43%)                                   |                      |
| <b>Marital status</b>      |                                                  |                                                | <0.001               |
| Single                     | 3,757 (24%)                                      | 7,772 (26%)                                    |                      |
| Married/Living as married  | 9,647 (62%)                                      | 19,408 (64%)                                   |                      |
| Separated/divorced/widowed | 2,155 (14%)                                      | 3,197 (11%)                                    |                      |
| <b>Employment status</b>   |                                                  |                                                | <0.001               |
| Unemployed                 | 3,887 (57%)                                      | 7,307 (45%)                                    |                      |
| Employed                   | 2,979 (43%)                                      | 8,900 (55%)                                    |                      |
| <b>Residence location</b>  |                                                  |                                                | <0.001               |
| Urban                      | 950 (5%)                                         | 2,849 (8%)                                     |                      |
| Peri-Urban                 | 5,599 (31%)                                      | 11,813 (33%)                                   |                      |
| Rural                      | 11,436 (64%)                                     | 21,299 (59%)                                   |                      |

*Table S1 Differences between the enrolled and unenrolled populations. This table is re-published from Gunda et al., 2022 (1), which was published by Oxford University Press on behalf of the International Epidemiological Association as an Open Access article distributed under the terms of the Creative Commons Attribution License (<https://creativecommons.org/licenses/by/4.0/>), which permits unrestricted reuse, distribution, and reproduction in any medium, provided the original work is properly cited.*

## Supplemental figures and tables

Table S2. Confidence interval data for figure 2

Figure 2B: Disease distribution

| Characteristic | N     | N = 9,898 <sup>1</sup> | 95% CI <sup>2</sup> |
|----------------|-------|------------------------|---------------------|
| HIVDiag        | 9,878 | 61.7                   | 61% , 63%           |
| HTNDiag        | 9,883 | 46.6                   | 46% , 48%           |
| DMDiag         | 9,879 | 17.6                   | 17% , 18%           |

<sup>1</sup>%

<sup>2</sup>CI = Confidence Interval

Figure 2C-D: Needs scores for diseases

| Characteristic                    | N     | N = 9,898 <sup>1</sup> | 95% CI <sup>2</sup> |
|-----------------------------------|-------|------------------------|---------------------|
| Max_detail                        | 9,898 |                        |                     |
| Diagnosed and well controlled     |       | 50.1%                  | 49% , 51%           |
| Diagnosed suboptimally controlled |       | 18.2%                  | 17% , 19%           |
| Diagnosed and not engaged         |       | 13.0%                  | 12% , 14%           |
| Undiagnosed and uncontrolled      |       | 18.8%                  | 18% , 20%           |
| HIV_detail                        | 6,096 |                        |                     |
| Diagnosed and well controlled     |       | 78.3%                  | 77% , 79%           |
| Diagnosed suboptimally controlled |       | 8.9%                   | 8.2% , 9.7%         |
| Diagnosed and not engaged         |       | 2.5%                   | 2.2% , 3.0%         |
| Undiagnosed and uncontrolled      |       | 10.2%                  | 9.5% , 11%          |
| HTN_detail                        | 4,603 |                        |                     |
| Diagnosed and well controlled     |       | 41.8%                  | 40% , 43%           |
| Diagnosed suboptimally controlled |       | 24.3%                  | 23% , 26%           |
| Diagnosed and not engaged         |       | 15.4%                  | 14% , 17%           |
| Undiagnosed and uncontrolled      |       | 18.5%                  | 17% , 20%           |
| DM_detail                         | 1,737 |                        |                     |
| Diagnosed and well controlled     |       | 6.9%                   | 5.8% , 8.2%         |
| Diagnosed suboptimally controlled |       | 33.7%                  | 31% , 36%           |

| <b>Characteristic</b>        | <b>N</b> | <b>N = 9,898<sup>1</sup></b> | <b>95% CI<sup>2</sup></b> |
|------------------------------|----------|------------------------------|---------------------------|
| Diagnosed and not engaged    |          | 32.2%                        | 30% , 35%                 |
| Undiagnosed and uncontrolled |          | 27.2%                        | 25% , 29%                 |

<sup>1</sup>%

<sup>2</sup>CI = Confidence Interval

*Figure S3 Confidence interval data for figure 2.*



Table S3. Needs scores broken down by disease combinations.

Table S3a: Overall need scores for individual and combinations of diseases.

| HIVDiag | HTNDiag | DMDiag | Total | Need_1       | Need_2      | Need_3      | Need_4      |
|---------|---------|--------|-------|--------------|-------------|-------------|-------------|
| 0       | 0       | 1      | 416   | 17 (4.1%)    | 79 (19%)    | 194 (46.6%) | 126 (30.3%) |
| 0       | 1       | 0      | 2428  | 905 (37.3%)  | 545 (22.4%) | 464 (19.1%) | 514 (21.2%) |
| 0       | 1       | 1      | 936   | 48 (5.1%)    | 407 (43.5%) | 268 (28.6%) | 213 (22.8%) |
| 1       | 0       | 0      | 4684  | 3566 (76.1%) | 463 (9.9%)  | 114 (2.4%)  | 541 (11.5%) |
| 1       | 0       | 1      | 179   | 9 (5%)       | 25 (14%)    | 59 (33%)    | 86 (48%)    |
| 1       | 1       | 0      | 1015  | 380 (37.4%)  | 205 (20.2%) | 127 (12.5%) | 303 (29.9%) |
| 1       | 1       | 1      | 203   | 9 (4.4%)     | 71 (35%)    | 50 (24.6%)  | 73 (36%)    |

Table S3b: Need scores for individual and combinations of diseases amongst participants 15-29 years of age.

| HIVDiag | HTNDiag | DMDiag | Total | Need_1      | Need_2      | Need_3     | Need_4      |
|---------|---------|--------|-------|-------------|-------------|------------|-------------|
| 0       | 0       | 1      | 52    | 5 (9.6%)    | 5 (9.6%)    | 31 (59.6%) | 11 (21.2%)  |
| 0       | 1       | 0      | 202   | 17 (8.4%)   | 5 (2.5%)    | 45 (22.3%) | 135 (66.8%) |
| 0       | 1       | 1      | 3     | 0 (0%)      | 0 (0%)      | 2 (66.7%)  | 1 (33.3%)   |
| 1       | 0       | 0      | 1264  | 798 (63.1%) | 148 (11.7%) | 26 (2.1%)  | 292 (23.1%) |
| 1       | 0       | 1      | 11    | 0 (0%)      | 0 (0%)      | 5 (45.5%)  | 6 (54.5%)   |
| 1       | 1       | 0      | 51    | 7 (13.7%)   | 4 (7.8%)    | 6 (11.8%)  | 34 (66.7%)  |

Table S3c: Need scores for individual and combinations of diseases amongst participants 30-49 years of age.

| HIVDiag | HTNDiag | DMDiag | Total | Need_1       | Need_2     | Need_3     | Need_4      |
|---------|---------|--------|-------|--------------|------------|------------|-------------|
| 0       | 0       | 1      | 85    | 1 (1.2%)     | 13 (15.3%) | 35 (41.2%) | 36 (42.4%)  |
| 0       | 1       | 0      | 327   | 80 (24.5%)   | 39 (11.9%) | 84 (25.7%) | 124 (37.9%) |
| 0       | 1       | 1      | 55    | 4 (7.3%)     | 20 (36.4%) | 18 (32.7%) | 13 (23.6%)  |
| 1       | 0       | 0      | 2678  | 2111 (78.8%) | 267 (10%)  | 84 (3.1%)  | 216 (8.1%)  |
| 1       | 0       | 1      | 85    | 2 (2.4%)     | 11 (12.9%) | 23 (27.1%) | 49 (57.6%)  |
| 1       | 1       | 0      | 433   | 126 (29.1%)  | 60 (13.9%) | 69 (15.9%) | 178 (41.1%) |
| 1       | 1       | 1      | 46    | 1 (2.2%)     | 13 (28.3%) | 14 (30.4%) | 18 (39.1%)  |

Table S3d: Need scores for individual and combinations of diseases amongst participants ≥50 years of age.

| HIVDiag | HTNDiag | DMDiag | Total | Need_1      | Need_2      | Need_3      | Need_4      |
|---------|---------|--------|-------|-------------|-------------|-------------|-------------|
| 0       | 0       | 1      | 279   | 11 (3.9%)   | 61 (21.9%)  | 128 (45.9%) | 79 (28.3%)  |
| 0       | 1       | 0      | 1899  | 808 (42.5%) | 501 (26.4%) | 335 (17.6%) | 255 (13.4%) |
| 0       | 1       | 1      | 878   | 44 (5%)     | 387 (44.1%) | 248 (28.2%) | 199 (22.7%) |
| 1       | 0       | 0      | 742   | 657 (88.5%) | 48 (6.5%)   | 4 (0.5%)    | 33 (4.4%)   |
| 1       | 0       | 1      | 83    | 7 (8.4%)    | 14 (16.9%)  | 31 (37.3%)  | 31 (37.3%)  |
| 1       | 1       | 0      | 531   | 247 (46.5%) | 141 (26.6%) | 52 (9.8%)   | 91 (17.1%)  |
| 1       | 1       | 1      | 157   | 8 (5.1%)    | 58 (36.9%)  | 36 (22.9%)  | 55 (35%)    |

# Vukuzazi questionnaires

## 1) History of NCDs

| History of Raised Blood Pressure                                                                                                      |                             |      |
|---------------------------------------------------------------------------------------------------------------------------------------|-----------------------------|------|
| Question                                                                                                                              | Response                    | Code |
| Have you ever had your blood pressure measured by a doctor or other health worker?                                                    | Yes 1                       | H1   |
|                                                                                                                                       | No 2 <i>If No, go to H4</i> |      |
| Have you ever been told by a doctor or other health worker that you have raised blood pressure or hypertension?                       | Yes 1                       | H2a  |
|                                                                                                                                       | No 2 <i>If No, go to H4</i> |      |
| Have you been told in the past 12 months?                                                                                             | Yes 1                       | H2b  |
|                                                                                                                                       | No 2                        |      |
| In the past 6 months, have you seen a doctor or other health care worker about your high blood pressure?                              | Yes 1                       | H2c  |
|                                                                                                                                       | No 2                        |      |
| In the past two weeks, have you taken any drugs (medication) for raised blood pressure prescribed by a doctor or other health worker? | Yes 1                       | H3   |
|                                                                                                                                       | No 2                        |      |
| Have you ever seen a traditional healer for raised blood pressure or hypertension?                                                    | Yes 1                       | H4   |
|                                                                                                                                       | No 2 <i>If No, go to H6</i> |      |
| Are you currently taking any herbal or traditional remedy for your raised blood pressure?                                             | Yes 1                       | H5   |
|                                                                                                                                       | No 2                        |      |

| History of Diabetes                                                                                      |                              |     |
|----------------------------------------------------------------------------------------------------------|------------------------------|-----|
| Have you ever had your blood sugar measured by a doctor or other health worker?                          | Yes 1                        | H6  |
|                                                                                                          | No 2 <i>If No, go to H10</i> |     |
| Have you ever been told by a doctor or other health worker that you have raised blood sugar or diabetes? | Yes 1                        | H7a |
|                                                                                                          | No 2 <i>If No, go to H12</i> |     |
| Have you been told in the past 12 months?                                                                | Yes 1                        | H7b |
|                                                                                                          | No 2                         |     |

|                                                                                                                          |       |     |
|--------------------------------------------------------------------------------------------------------------------------|-------|-----|
| In the past 6 months, have you seen a doctor or other health care worker about your raised blood sugar or diabetes?      | Yes 1 | H7c |
|                                                                                                                          | No 2  |     |
| In the past two weeks, have you taken any drugs (medication) for diabetes prescribed by a doctor or other health worker? | Yes 1 | H8  |
|                                                                                                                          | No 2  |     |
| Are you currently taking insulin for diabetes prescribed by a doctor or other health worker?                             | Yes 1 | H9  |
|                                                                                                                          | No 2  |     |

|                                                                              |                                       |     |
|------------------------------------------------------------------------------|---------------------------------------|-----|
| Have you ever seen a traditional healer for diabetes or raised blood sugar?  | Yes 1<br>No 2 <i>If No, go to H12</i> | H10 |
| Are you currently taking any herbal or traditional remedy for your diabetes? | Yes 1<br>No 2                         | H11 |

| History of Raised Total Cholesterol                                                                                                               |                                       |      |
|---------------------------------------------------------------------------------------------------------------------------------------------------|---------------------------------------|------|
| Question                                                                                                                                          | Response                              | Code |
| Have you ever had your cholesterol (fat levels in your blood) measured by a doctor or other health worker?                                        | Yes 1<br>No 2 <i>If No, go to H15</i> | H12  |
| Have you ever been told by a doctor or other health worker that you have raised cholesterol?                                                      | Yes 1<br>No 2 <i>If No, go to H15</i> | H13a |
| Have you been told in the past 12 months?                                                                                                         | Yes 1<br>No 2                         | H13b |
| In the past two weeks, have you taken any oral treatment (medication) for raised total cholesterol prescribed by a doctor or other health worker? | Yes 1<br>No 2                         | H14  |
| Have you ever seen a traditional healer for raised cholesterol?                                                                                   | Yes 1<br>No 2 <i>If No, go to H17</i> | H15  |
| Are you currently taking any herbal or traditional remedy for your raised cholesterol?                                                            | Yes 1<br>No 2                         | H16  |

| History of Cardiovascular Diseases                                                                                                      |                            |     |
|-----------------------------------------------------------------------------------------------------------------------------------------|----------------------------|-----|
| Have you ever had a heart attack or chest pain from heart disease (angina)?                                                             | Yes 1<br>No 2              | H17 |
| Are you currently taking aspirin regularly to prevent or treat heart disease?                                                           | Yes 1<br>No 2              | H18 |
| Are you currently taking statins (Lovastatin/Simvastatin/Atorvastatin or any other statin) regularly to prevent or treat heart disease? | Yes 1<br>No 2              | H19 |
| Did your mother or father have a heart attack before the age of 60?                                                                     | Yes 1<br>No 2<br>Unknown 3 | H20 |
| Have you ever had a stroke (cerebrovascular accident or incident)?                                                                      | Yes 1<br>No 2              | H21 |
| Are you currently taking aspirin regularly to prevent a stroke?                                                                         | Yes 1<br>No 2              | H22 |

|                                                                                                                                                                 |                                                       |     |
|-----------------------------------------------------------------------------------------------------------------------------------------------------------------|-------------------------------------------------------|-----|
| Are you currently taking statins (Lovastatin/Simvastatin/Atorvastatin or any other statin) regularly to prevent or treat a stroke?                              | Yes 1<br>No 2                                         | H23 |
| Did your mother or father have a stroke before the age of 60?                                                                                                   | Yes 1<br>No 2<br>Unknown 3                            | H24 |
| <b>History of cancer</b>                                                                                                                                        |                                                       |     |
| Have you been treated for cancer before?                                                                                                                        | Yes 1                                                 | CA1 |
|                                                                                                                                                                 | No 2                                                  |     |
|                                                                                                                                                                 | Unknown 3                                             |     |
| If yes, which cancer                                                                                                                                            | Free text                                             | CA2 |
| <b>Quality of Life</b>                                                                                                                                          |                                                       |     |
| We will now ask you some questions about your general health.w                                                                                                  |                                                       |     |
| For the following questions, please indicate which statements best describe your own health state <u>today</u> .                                                |                                                       |     |
| First, I would like to ask you about <u>mobility</u> .<br>Would you say you have ...                                                                            | No problems walking about 1                           | Q1  |
|                                                                                                                                                                 | Some problems walking about 2                         |     |
|                                                                                                                                                                 | You are confined to bed 3                             |     |
| Next, I would like to ask you about <u>self-care</u> .<br>Would you say you have ...                                                                            | No problems with self-care 1                          | Q2  |
|                                                                                                                                                                 | Some problems washing or dressing yourself 2          |     |
|                                                                                                                                                                 | You are unable to wash or dress yourself 3            |     |
| Next, I would like to ask you about your <u>usual activities</u> , for example work, study, housework, family or leisure activities. Would you say you have ... | No problems with performing your usual activities 1   | Q3  |
|                                                                                                                                                                 | Some problems with performing your usual activities 2 |     |
|                                                                                                                                                                 | You are unable to perform your usual activities 3     |     |
| Next, I would like to ask you about <u>pain or discomfort</u> .<br>Would you say you have ...                                                                   | No pain or discomfort 1                               | Q4  |
|                                                                                                                                                                 | Moderate pain or discomfort 2                         |     |
|                                                                                                                                                                 | Extreme pain or discomfort 3                          |     |
| Finally, I would like to ask you about <u>anxiety or depression</u> .<br>Would you say you have ...                                                             | Not anxious or depressed 1                            | Q5  |
|                                                                                                                                                                 | Moderately anxious or depressed 2                     |     |
|                                                                                                                                                                 | Extremely anxious or depressed 3                      |     |

|                                                                                                                                                                                                                                                                                                                                                                                                                                                                                                                       |                                   |           |
|-----------------------------------------------------------------------------------------------------------------------------------------------------------------------------------------------------------------------------------------------------------------------------------------------------------------------------------------------------------------------------------------------------------------------------------------------------------------------------------------------------------------------|-----------------------------------|-----------|
| <p>I would now like to ask you to do a different task.</p> <p>To help you say how good or bad your health state is, I would like you to try to picture in your mind a scale that looks a bit like a thermometer. Can you do that? The best health state you can imagine is marked 100 (one hundred) at the top of the scale and the worst state you can imagine is marked 0 (zero) at the bottom.</p> <p>I would now like you to tell me the point on this scale where you would put your own health state today.</p> | <p>Integer (limited to 0-100)</p> | <p>Q6</p> |
|-----------------------------------------------------------------------------------------------------------------------------------------------------------------------------------------------------------------------------------------------------------------------------------------------------------------------------------------------------------------------------------------------------------------------------------------------------------------------------------------------------------------------|-----------------------------------|-----------|

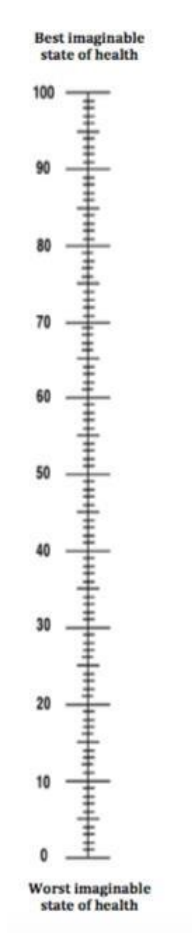

## 2) Behavioral measurements

| Tobacco Use                                                                                                                                                                                     |                                                                                                                                                                                                                                |          |
|-------------------------------------------------------------------------------------------------------------------------------------------------------------------------------------------------|--------------------------------------------------------------------------------------------------------------------------------------------------------------------------------------------------------------------------------|----------|
| I am going to ask you some questions about tobacco use.                                                                                                                                         |                                                                                                                                                                                                                                |          |
| Question                                                                                                                                                                                        | Response                                                                                                                                                                                                                       | Code     |
| Do you <b>currently</b> smoke any <b>tobacco</b> products, such as cigarettes, cigars or pipes?<br>(USE SHOWCARD)                                                                               | Yes 1<br>No 2 <i>If No, go to T8</i>                                                                                                                                                                                           | T1       |
| Do you currently smoke tobacco products <b>daily</b> ?                                                                                                                                          | Yes 1<br>No 2                                                                                                                                                                                                                  | T2       |
| How old were you when you <b>first started</b> smoking?                                                                                                                                         | Age (years)<br>Don't know<br><input type="text"/> <input type="text"/> <input type="text"/> <i>If Known, go to T5a/T5aw</i>                                                                                                    | T3       |
| Do you remember how long ago it was?<br>(RECORD ONLY 1, NOT ALL 3)<br><br>Don't know                                                                                                            | In Years <input type="text"/> <input type="text"/> <input type="text"/> <i>If Known, go to T5a/T5aw</i>                                                                                                                        | T4a      |
|                                                                                                                                                                                                 | OR in Months <input type="text"/> <input type="text"/> <input type="text"/> <i>If Known, go to T5a/T5aw</i>                                                                                                                    | T4b      |
|                                                                                                                                                                                                 | OR in Weeks <input type="text"/> <input type="text"/> <input type="text"/>                                                                                                                                                     | T4c      |
| On average, <b>how many</b> of the following products do you smoke <b>each day/week</b> ?<br>(IF LESS THAN DAILY, RECORD WEEKLY)<br><br>(RECORD FOR EACH TYPE, USE SHOWCARD)<br><br>Don't Know  | DAILY↓<br>WEEKLY↓                                                                                                                                                                                                              |          |
|                                                                                                                                                                                                 | Manufactured cigarettes <input type="text"/>                                | T5a/T5aw |
|                                                                                                                                                                                                 | Hand-rolled cigarettes <input type="text"/>                                 | T5b/T5bw |
|                                                                                                                                                                                                 | Pipes full of tobacco <input type="text"/>                                  | T5c/T5cw |
|                                                                                                                                                                                                 | Cigars, cheroots, cigarillos <input type="text"/>                           | T5d/T5dw |
|                                                                                                                                                                                                 | Number of Shisha sessions <input type="text"/>                              | T5e/T5ew |
|                                                                                                                                                                                                 | Other <input type="text"/> <input type="text"/><br><i>If Other, go to T5other, else go to T6</i> | T5f/T5fw |
| Other (please specify): <input type="text"/> | T5other/<br>T5otherw                                                                                                                                                                                                           |          |
| During the past 12 months, have you tried to <b>stop smoking</b> ?                                                                                                                              | Yes<br>No 1 2                                                                                                                                                                                                                  | T6       |
| During any visit to a doctor or other health worker in the past 12 months, were you advised to quit smoking tobacco?                                                                            | Yes 1<br>No 2<br>No visit during the past 12 months 3                                                                                                                                                                          | T7       |
| In the past, did you <b>ever smoke</b> any tobacco products?<br>(USE SHOWCARD)                                                                                                                  | Yes 1 <i>If No, go to A1</i><br>No 2 <i>If No, go to A1</i>                                                                                                                                                                    | T8       |
| In the past, did you <b>ever smoke daily</b> ?                                                                                                                                                  | Yes 1<br>No 2                                                                                                                                                                                                                  | T9       |
| How old were you when you <b>first started</b> smoking?                                                                                                                                         | Age (years)<br>Don't know <input type="text"/> <input type="text"/> <input type="text"/> <i>If Known, go to T5a/T5aw</i>                                                                                                       | T10      |

|                                                                                                 |                                                                                                                                                                                                                                                      |                                                                                                           |                                     |
|-------------------------------------------------------------------------------------------------|------------------------------------------------------------------------------------------------------------------------------------------------------------------------------------------------------------------------------------------------------|-----------------------------------------------------------------------------------------------------------|-------------------------------------|
| Do you remember how long ago it was?<br><br><i>Don't know</i>                                   | In Years <input type="text"/> <input type="text"/><br>OR in Months <input type="text"/> <input type="text"/><br>OR in Weeks <input type="text"/> <input type="text"/>                                                                                | <i>If Known, go to T5a/T5aw</i><br><i>If Known, go to T5a/T5aw</i>                                        | T11a<br>T11b<br>T11c                |
| How old were you when you <b>last quit</b> smoking?<br><br>Do you remember how long ago it was? | Age (years) <input type="text"/> <input type="text"/><br>Don't know<br><br>In Years <input type="text"/> <input type="text"/><br>OR in Months <input type="text"/> <input type="text"/><br><br>OR in Weeks <input type="text"/> <input type="text"/> | <i>If Known, go to T5a/T5aw</i><br><br><i>If Known, go to T5a/T5aw</i><br><i>If Known, go to T5a/T5aw</i> | T12<br><br>T13a<br>T13b<br><br>T13c |

## Alcohol Consumption

The next questions ask about the consumption of alcohol.

| Question                                                                                                                                               | Response                                  | Code |
|--------------------------------------------------------------------------------------------------------------------------------------------------------|-------------------------------------------|------|
| Have you <b>ever</b> consumed any alcohol such as beer, wine, spirits or <i>[add other local examples]</i> ?<br><i>(USE SHOWCARD OR SHOW EXAMPLES)</i> | Yes 1<br><br>No 2 <i>If No, go to TB1</i> | A1   |
| Have you consumed any alcohol within the <b>past 12 months</b> ?                                                                                       | Yes 1 <i>If Yes, go to A4</i><br>No 2     | A2   |

|                                                                                                                                                                 |                                                                                                                                  |    |
|-----------------------------------------------------------------------------------------------------------------------------------------------------------------|----------------------------------------------------------------------------------------------------------------------------------|----|
| Have you stopped drinking due to health reasons, such as a negative impact on your health or on the advice of your doctor or other health worker?               | Yes 1<br>No 2                                                                                                                    | A3 |
| During the past 12 months, <b>how frequently</b> have you had at least one standard alcoholic drink?<br><br><i>(READ RESPONSES, USE SHOWCARD)</i>               | Daily 1<br>5-6 days per week 2<br>3-4 days per week 3<br>1-2 days per week 4<br>1-3 days per month 5<br>Less than once a month 6 | A4 |
| Have you consumed any alcohol within the <b>past 30 days</b> ?                                                                                                  | Yes 1<br>No 2 <i>If No, go to TB1</i>                                                                                            | A5 |
| During the past 30 days, on how many <b>occasions</b> did you have at least one standard alcoholic drink?                                                       | Number<br>Don't know <input type="text"/> <input type="text"/>                                                                   | A6 |
| During the past 30 days, when you drank alcohol, how many <b>standard drinks on average</b> did you have during one drinking occasion?<br><i>(USE SHOWCARD)</i> | Number<br>Don't know <input type="text"/> <input type="text"/>                                                                   | A7 |
| During the past 30 days, what was the <b>largest number</b> of standard drinks you had on a single occasion, counting all types of alcoholic drinks together?   | Largest number<br>Don't Know <input type="text"/> <input type="text"/>                                                           | A8 |
| During the past 30 days, how many times did you have <b>six or more</b> standard drinks in a single drinking occasion?                                          | Number of times<br>Don't Know <input type="text"/> <input type="text"/>                                                          | A9 |

|                                                                                                                                       |           |     |      |
|---------------------------------------------------------------------------------------------------------------------------------------|-----------|-----|------|
| <p>During each of the <b>past 7 days</b>, how many standard drinks did you have each day?</p> <p>(USE SHOWCARD)</p> <p>Don't Know</p> | Monday    | ___ | A10a |
|                                                                                                                                       | Tuesday   | ___ | A10b |
|                                                                                                                                       | Wednesday | ___ | A10c |
|                                                                                                                                       | Thursday  | ___ | A10d |
|                                                                                                                                       | Friday    | ___ | A10e |
|                                                                                                                                       | Saturday  | ___ | A10f |
|                                                                                                                                       | Sunday    | ___ | A10g |

| Alcohol Consumption, continued                                                                                                                                                                                                                                                                                                                                                                                        |                                                                                         |      |
|-----------------------------------------------------------------------------------------------------------------------------------------------------------------------------------------------------------------------------------------------------------------------------------------------------------------------------------------------------------------------------------------------------------------------|-----------------------------------------------------------------------------------------|------|
| <p>I have just asked you about your consumption of alcohol during the past 7 days. The questions were about alcohol in general, while the next questions refer to your consumption of homebrewed alcohol, alcohol brought over the border/from another country, any alcohol not intended for drinking or other untaxed alcohol. Please only think about these types of alcohol when answering the next questions.</p> |                                                                                         |      |
| Question                                                                                                                                                                                                                                                                                                                                                                                                              | Response                                                                                | Code |
| <p>During the <b>past 7 days</b>, did you consume any <b>homebrewed</b> alcohol, any alcohol <b>brought over the border/from another country</b>, any alcohol <b>not intended for drinking</b> or other <b>untaxed</b> alcohol?</p> <p>[AMEND ACCORDING TO LOCAL CONTEXT]<br/>(USE SHOWCARD)</p>                                                                                                                      | <p>Yes 1</p> <p>No 2 If No, go to TB1</p>                                               | A11  |
| <p>On average, <b>how many standard drinks</b> of the following did you consume <b>during the past 7 days</b>?</p> <p>[INSERT COUNTRY-SPECIFIC EXAMPLES]<br/>(USE SHOWCARD)</p> <p>Don't Know</p>                                                                                                                                                                                                                     | Homebrewed spirits, e.g. moonshine                                                      | A12a |
|                                                                                                                                                                                                                                                                                                                                                                                                                       | Homebrewed beer or wine, e.g. beer, palm or fruit wine                                  | A12b |
|                                                                                                                                                                                                                                                                                                                                                                                                                       | Alcohol brought over the border/from another country                                    | A12c |
|                                                                                                                                                                                                                                                                                                                                                                                                                       | Alcohol not intended for drinking, e.g. alcohol-based medicines, perfumes, after shaves | A12d |
|                                                                                                                                                                                                                                                                                                                                                                                                                       | Other untaxed alcohol in the country                                                    | A12e |



3) TB screening and asthma/COPD questions

| TB screening questions                                                                                                                                                                                                |                 |                         |      |
|-----------------------------------------------------------------------------------------------------------------------------------------------------------------------------------------------------------------------|-----------------|-------------------------|------|
| Are you <b>currently</b> on TB treatment?                                                                                                                                                                             | Yes             | 1                       | TB1  |
|                                                                                                                                                                                                                       | No              | 2 If no, go to TB3      |      |
| If yes, have you received injections as part of this TB treatment?                                                                                                                                                    | Yes             | 1                       | TB2  |
|                                                                                                                                                                                                                       | No              | 2                       |      |
|                                                                                                                                                                                                                       | Unknown         | 3                       |      |
| If yes, when did you start your current treatment for TB?                                                                                                                                                             | Date            |                         | TB2a |
| Have you been on TB treatment <b>before</b> ?                                                                                                                                                                         | Yes             | 1                       | TB3  |
|                                                                                                                                                                                                                       | No              | 2 If No, go to TB6      |      |
|                                                                                                                                                                                                                       | Unknown         | 3 If Unknown, go to TB6 |      |
| If yes, how many times have you been on TB treatment?                                                                                                                                                                 | Number of times |                         | TB4a |
| Do you remember how old you were when you had your FIRST diagnosis of TB?                                                                                                                                             | Yes             | 1 If Yes, go to TB4c    | TB4b |
|                                                                                                                                                                                                                       | No              |                         |      |
| Age                                                                                                                                                                                                                   | Years           |                         | TB4c |
| Do you remember the exact date or year when you completed your last TB treatment?                                                                                                                                     | Exact date      |                         | TB5  |
|                                                                                                                                                                                                                       | Year only       |                         |      |
|                                                                                                                                                                                                                       | I don't know    |                         |      |
| Has anyone in your homestead (or residential plot), during your lifetime, <b>ever</b> had TB disease? (Including those who might not have started TB treatment but were told by a clinician that they had TB disease) | Yes             | 1                       | TB6  |
|                                                                                                                                                                                                                       | No              | 2                       |      |
|                                                                                                                                                                                                                       | Unknown         | 3                       |      |

|                                                                                      |                 |                     |      |
|--------------------------------------------------------------------------------------|-----------------|---------------------|------|
| Is anybody in your homestead (or residential plot) <b>currently</b> on TB treatment? | Yes             | 1                   | TB7  |
|                                                                                      | No              | 2                   |      |
|                                                                                      | Unknown         | 3                   |      |
| Do you <b>currently</b> have a cough?                                                | Yes             | 1                   | TB8  |
|                                                                                      | No              | 2 If No, go to TB11 |      |
| If yes, how long have you had the cough                                              | Number of weeks |                     | TB9  |
| If yes, do you cough up sputum?                                                      | Yes             | 1                   | TB10 |
|                                                                                      | No              | 2                   |      |
| Do you have a fever?                                                                 | Yes             | 1                   | TB11 |
|                                                                                      | No              | 2                   |      |

|                                                                                                                                                                     |                 |                             |      |
|---------------------------------------------------------------------------------------------------------------------------------------------------------------------|-----------------|-----------------------------|------|
| If yes, how long have you had a fever?                                                                                                                              | Number of weeks |                             | TB12 |
| Do you have drenching night sweats? ( <i>Sweating at night that soaks your clothes or beddings</i> )                                                                | Yes             | 1                           | TB13 |
|                                                                                                                                                                     | No              | 2 <i>If No, go to TB15</i>  |      |
| If yes, how long have you had drenching night sweats?                                                                                                               | Number of weeks |                             | TB14 |
| Have you lost weight in the last 6 months? ( <i>Explain to the participant that this is unexplained or unintentional weight loss</i> )                              | Yes             | 1                           | TB15 |
|                                                                                                                                                                     | No              | 2 <i>If No, go to TB171</i> |      |
| If yes, how much weight have you lost in the last 6 months?                                                                                                         | Kg              |                             | TB16 |
| Do you have any other symptoms apart from those already mentioned? ( <i>Prompt for TB specific symptoms [fatigue, haemoptysis, chest pain, and lymphadenitis]</i> ) | Yes             | 1                           | TB17 |
|                                                                                                                                                                     | No              | 2 <i>If No, go to AS1</i>   |      |
| If yes, which symptom                                                                                                                                               | Fatigue         |                             | TB18 |
|                                                                                                                                                                     | Haemoptysis     |                             |      |
|                                                                                                                                                                     | Chest pain      |                             |      |
|                                                                                                                                                                     | Lymphadenitis   |                             |      |
| If yes, duration of the symptom                                                                                                                                     | Number of weeks |                             | TB19 |

| <b>Asthma / COPD questions</b>                                                                                       |     |                           |     |
|----------------------------------------------------------------------------------------------------------------------|-----|---------------------------|-----|
| Have you ever been told by a doctor or other health worker that you have asthma or COPD?                             | Yes | 1                         | AS1 |
|                                                                                                                      | No  | 2 <i>If No, go to AS4</i> |     |
| Have you been told in the past 12 months?                                                                            | Yes | 1                         | AS2 |
|                                                                                                                      | No  | 2                         |     |
| In the past two weeks, have you taken any medication for asthma/COPD prescribed by a doctor or other health worker?  | Yes | 1                         | AS3 |
|                                                                                                                      | No  | 2                         |     |
| Do you have shortness of breath after exercise or physical activity?                                                 | Yes | 1                         | AS4 |
|                                                                                                                      | No  | 2                         |     |
| Do you wake up at night because of difficulties in breathing/shortness of breath?                                    | Yes | 1                         | AS5 |
|                                                                                                                      | No  | 2                         |     |
| Do you experience wheezing at night? ( <i>Wheezing explained as a whistling sound that is made while breathing</i> ) | Yes | 1                         | AS6 |
|                                                                                                                      | No  | 2                         |     |

#### 4) HIV questions

| <b>HIV questions</b>                          |     |   |     |
|-----------------------------------------------|-----|---|-----|
| Have you ever received a test result for HIV? | Yes | 1 | HI1 |

|                                                                                             |                |                                 |     |
|---------------------------------------------------------------------------------------------|----------------|---------------------------------|-----|
|                                                                                             | No             | 2 <i>If No, go to Section 5</i> |     |
|                                                                                             | Unknown        | 3 <i>If No, go to Section 5</i> |     |
| Have you ever had a positive HIV test result?                                               | Yes            | 1                               | HI2 |
|                                                                                             | No             | 2                               |     |
|                                                                                             | Unknown        | 3                               |     |
| <b>HIV-positive</b>                                                                         |                |                                 |     |
| Do you remember the exact date, or year of your first positive test result?                 | Exact date     |                                 | HI3 |
|                                                                                             | Year only      |                                 |     |
|                                                                                             | I don't know   |                                 |     |
| Have you ever been on ART?                                                                  | Yes            | 1 <i>If Yes, go to HI5</i>      | HI4 |
|                                                                                             | No             | 2 <i>If No, go to Section 5</i> |     |
|                                                                                             | Unknown        |                                 |     |
| Are you currently receiving ART?                                                            | Yes            | 1                               | HI5 |
|                                                                                             | No             | 2                               |     |
|                                                                                             | Refused to say | 3                               |     |
| Do you remember the exact date, or year when you first started ART did you first start ART? | Exact date     |                                 | HI6 |
|                                                                                             | Year only      |                                 |     |
|                                                                                             | I don't know   |                                 |     |

|                                                                                                                                            |         |   |     |
|--------------------------------------------------------------------------------------------------------------------------------------------|---------|---|-----|
| Have you ever stopped/defaulted from ART treatment? ( <i>Defaulted explained as not taken treatment for more than 3 months – 90 days</i> ) | Yes     | 1 | HI7 |
|                                                                                                                                            | No      | 2 |     |
|                                                                                                                                            | Unknown | 3 |     |
| How many times                                                                                                                             | Times   |   | HI8 |
| <b>HIV-negative</b>                                                                                                                        |         |   |     |
| When was your last negative test result?                                                                                                   | Date    | 0 | HI9 |
|                                                                                                                                            |         |   |     |

5) Any other medical problem for which you regularly see a doctor (or traditional healer) or for which you have been prescribed a medication?

| Medical problems                                                                                                                           |                                                 |                   |                  |                  |            |
|--------------------------------------------------------------------------------------------------------------------------------------------|-------------------------------------------------|-------------------|------------------|------------------|------------|
| Any other medical problem for which you regularly see a doctor (or traditional healer) or for which you have been prescribed a medication? |                                                 |                   |                  |                  |            |
| Medical problem (select)                                                                                                                   | Date/Year started                               |                   |                  |                  |            |
| Hypertension                                                                                                                               |                                                 |                   |                  |                  |            |
| Diabetes                                                                                                                                   |                                                 |                   |                  |                  |            |
| Cholesterol                                                                                                                                |                                                 |                   |                  |                  |            |
| Heart attack or stroke (cardiovascular disease)                                                                                            |                                                 |                   |                  |                  |            |
| Tuberculosis                                                                                                                               |                                                 |                   |                  |                  |            |
| Asthma/COPD                                                                                                                                |                                                 |                   |                  |                  |            |
| HIV                                                                                                                                        |                                                 |                   |                  |                  |            |
| Other                                                                                                                                      |                                                 |                   |                  |                  |            |
| Concurrent medication                                                                                                                      |                                                 |                   |                  |                  |            |
| Name medication                                                                                                                            | Indication (select)                             | Date/year started | Currently taking | Taking as needed | Not taking |
|                                                                                                                                            | Hypertension                                    |                   |                  |                  |            |
|                                                                                                                                            | Diabetes                                        |                   |                  |                  |            |
|                                                                                                                                            | Cholesterol                                     |                   |                  |                  |            |
|                                                                                                                                            | Heart attack or stroke (cardiovascular disease) |                   |                  |                  |            |
|                                                                                                                                            | Tuberculosis                                    |                   |                  |                  |            |
|                                                                                                                                            | Asthma/COPD                                     |                   |                  |                  |            |
|                                                                                                                                            | HIV                                             |                   |                  |                  |            |
|                                                                                                                                            | Other                                           |                   |                  |                  |            |

6) Operational questions

| Operational questions                |               |  |  |
|--------------------------------------|---------------|--|--|
| Time of last meal or non-water drink | Date and time |  |  |

|                                                                              |              |  |  |
|------------------------------------------------------------------------------|--------------|--|--|
| For women only:                                                              |              |  |  |
| Do you remember the exact date, or year when your last menstrual period was? | Exact date   |  |  |
|                                                                              | Year only    |  |  |
|                                                                              | I don't know |  |  |
|                                                                              | Never        |  |  |

## References

1. Gunda R, Koole O, Gareta D, Olivier S, Surujdeen A, Smit T, et al. Cohort Profile: The Vukuzazi ('Wake Up and Know Yourself' in isiZulu) population science programme. *Int J Epidemiol.* 2022;51(3):e131-e42.
